Preventable maternity deaths: a case series

1 **Preventable maternal deaths in England and Wales, 2013-2023: a systematic case**  
2 **series of coroners' reports**

3 Authors: Jessy Jindal<sup>1</sup>, David Launer<sup>1</sup>, Georgia C. Richards<sup>2</sup>, Francesco Dernie<sup>1,3</sup>

4 **1:** Medical Sciences Division, University of Oxford, Oxford OX3 9DU, UK.

5 **2:** Centre for Evidence-Based Medicine, Nuffield Department of Primary Care Health  
6 Sciences, University of Oxford, Radcliffe Observatory Quarter, Woodstock Road, Oxford  
7 OX2 6GG, UK.

8 **3:** Oxford University Hospitals NHS Trust, Oxford OX3 9DU, UK.

9 **Corresponding author:** Francesco Dernie, Oxford University Hospitals NHS Foundation  
10 Trust, Headley Way, Headington, Oxford, OX3 9DU, 0300 304 7777,  
11 fdernie@googlemail.com

12

13

14

15

16

17

18

19

Preventable maternity deaths: a case series

20 **Abstract**

21 **Objective:** Coroners in England and Wales have a duty to write Prevention of Future  
22 Deaths (PFDs) reports when they believe that action should be taken to prevent similar  
23 deaths. We aimed to characterise learnings from reports involving maternal deaths.

24 **Design:** Systematic case series

25 **Setting:** England and Wales

26 **Population or Sample:** Database of all coroners' PFDs published between July 2013  
27 and 1 August 2023. There were 4435 reports at the time of data collection.

28 **Methods:** A reproducible computer code developed from the Preventable Deaths Tracker  
29 (<https://preventabledeathstracker.net/>) was used to download all published PFDs from  
30 the Judiciary website. Reports were searched for keywords related to maternal deaths.  
31 Case information was extracted into pre-specified domains and compared to other data  
32 on maternal deaths.

33 **Main Outcome Measures:** Case demographics, causes of deaths, risk factors, coroner  
34 concerns and organisational responses.

35 **Results:** Twenty nine reports involved a maternal death. The median age at death was  
36 33.5 years (IQR 29-36 years) and 76% of deaths occurred in hospitals. The most common  
37 cause of death was haemorrhage. Coroners frequently voiced concerns around failure to  
38 provide appropriate treatment (57%), and failure of timely escalation (38%). Only 38% of  
39 PFDs had published responses. When organisations did respond to the coroner, 80%

Preventable maternity deaths: a case series

40 reported that they implemented changes, including publishing new local policies,  
41 increasing training, or committing to increased staffing.

42 **Conclusions:** PFDs highlight gaps in obstetric care which, if appropriately addressed,  
43 and regularly and routinely monitored, could prevent similar deaths.

44 **Funding:** None

45 **Keywords:** maternal deaths, obstetrics, maternity, mortality, preventable

46

47 **Funding**

48 No funding has been obtained to undertake this study.

49

50

51

52

53

54

55

56

57

## Preventable maternity deaths: a case series

### 58 **Introduction**

59 Global maternal deaths remain high and have stalled or worsened in 150 countries since  
60 2000<sup>1</sup>. In 2020, the global maternal mortality rate was 223 deaths per 100,000 live births,  
61 which corresponds approximately to one maternal death every 2 minutes<sup>1</sup>. In the United  
62 Kingdom (UK), between 2019 and 2021, the Mothers and Babies Reducing Risk through  
63 Audits and Confidential Enquiries (MBRRACE) programme reported 241 women died  
64 during or within 42 days of their pregnancy, a rate of 11.7 deaths per 100,000 maternities<sup>2</sup>.  
65 However, maternal deaths have not reduced in the past decade in the UK, and there is  
66 inequality in mortality rates for women from areas of economic deprivation and ethnic  
67 minorities<sup>2</sup>. As a result, the UK government commitment to ending maternity-related  
68 preventable deaths of both mothers and their children by 2030<sup>3</sup>.

69  
70 Coroners in England and Wales have a duty to report when they believe that action should  
71 be taken to prevent future deaths<sup>4</sup>. These reports are called Prevention of Future Deaths  
72 reports or PFDs<sup>4,5</sup>, which are sent to addressees who must respond to the coroner within  
73 56 days. PFDs are listed by the National Health Service (NHS) Patient Safety Strategy  
74 as an official source of data<sup>6</sup>, but it is unclear how they are used, if they are monitored,  
75 and what action is taken to prevent similar fatalities in the NHS. A detailed analysis of  
76 PFDs implicating maternal deaths could highlight factors contributing to maternal mortality  
77 and continuing inequalities in care. This would help inform clinical staff managing  
78 pregnancies and public health policy by highlighting points for improvement in care.

79

## Preventable maternity deaths: a case series

80 The aim of our study was to systematically determine the number of maternal deaths  
81 reported by coroners in PFDs and to characterise these deaths in terms of demographics,  
82 risk factors and causes of deaths. In addition, we aimed to explore concerns raised by  
83 coroners in these reports and understand what actions were reported by organisations in  
84 their responses to the coroner.

85

86

87

88

89

90

91

92

Preventable maternity deaths: a case series

## 93 **METHODS**

94 The systematic case series was designed and a study protocol was developed and  
95 preregistered on an open repository<sup>7</sup>.

### 96 **Data collection, screening and eligibility**

97 We used a reproducible, openly available code written by FD to download all portable  
98 document format (pdf) documents from the judiciary website published from inception  
99 (July 2013) to 1 August 2023. The code was reproduced from the Preventable Deaths  
100 Tracker (<https://preventabledeathstracker.net/>) and is available here:  
101 [https://github.com/francescodernie/coroner\\_PFDs](https://github.com/francescodernie/coroner_PFDs).

102  
103 We used the OCCRP Aleph tool<sup>8</sup> to create a repository of the PFDs to process the reports,  
104 allowing them to be machine-readable. We then conducted keyword searches using the  
105 following terms: ‘pregnancy’, ‘pregnant’, ‘maternal’, ‘post-partum’, ‘partum’, ‘natal’,  
106 ‘perinatal’, ‘antenatal’, ‘obstetrics’, ‘gestation’, ‘parturition’, ‘birth’, and the positive control  
107 word ‘coroner’ (to identify documents that could not be read automatically).

108  
109 Cases were included when a maternal death occurred, using the World Health  
110 Organisation (WHO) definition<sup>9</sup>: deaths of a female due to any causes related to or  
111 aggravated by pregnancy or its management, both during pregnancy, childbirth or within  
112 42 days of its resolution. We also included late maternal deaths defined as “the death of  
113 a woman from direct or indirect obstetric causes, more than 42 days but less than one  
114 year after termination of pregnancy”.<sup>9</sup> Deaths were excluded if the incidental causes of

## Preventable maternity deaths: a case series

115 death were unrelated to the pregnancy (e.g. a road traffic accident) as per the WHO  
116 definition.<sup>9</sup>

117

### 118 **Data extraction**

119 Data was extracted from the included PFDs in line with established methodology that has  
120 been used in other case series of PFDs<sup>10–12</sup>. Demographics, causes of deaths, pregnancy  
121 outcomes and risk factors, coroner concerns and organisational responses were  
122 extracted manually by two authors (JJ, DL) and reviewed by FD. Risk factors extracted  
123 were based on existing literature<sup>13</sup>, including gestational diabetes, hypertensive disease,  
124 obesity, cardiac disease, haematological disorders, psychiatric illness, epilepsy, aged  
125 <17 years or >35 years, recreational drug use, complications from previous pregnancy,  
126 multiple pregnancies, hepatic disease, and congenital anomalies of the child.

127 The numbers of maternal deaths (up to 1 year from birth) from MBRRACE-UK<sup>2</sup> were also  
128 extracted from each MBRRACE-UK report between 2014-2021, to compare to the  
129 number of PFDs in the same time period. Rolling averages over 3 year periods were  
130 taken to match the presentation of the MBRRACE-UK data.

131

### 132 **Data analysis**

133 The number of maternal deaths reported in coroners' PFDs and their rates as a proportion  
134 of the maternal deaths reported in MBRRACE-UK were calculated over time. Medians  
135 and interquartile ranges (IQRs) were calculated for continuous variables (e.g age) and  
136 frequencies were reported for categorical variables (e.g sex, location of death, and  
137 coroner jurisdiction area).

## Preventable maternity deaths: a case series

138

139 We calculated the years of life lost (YLL)<sup>14</sup> for each case (where age was reported) by  
140 extracting their remaining life expectancy from the ONS cohort life tables<sup>15</sup>. The cause of  
141 death determined by the coroner in each case was assigned to categories stipulated in  
142 the 2019-21 MBRRACE-UK report<sup>2</sup>. Two investigators (JJ, DL) also assigned the  
143 International Statistical Classification of Diseases and Related Health Problems 11th  
144 Revision (ICD-11) numeric codes for the causes of death to each PFD<sup>16</sup>.

145

146 Directed content analysis<sup>17</sup> was used to collate and evaluate concerns raised by coroner  
147 and classify them. Concerns were classified by one author (JJ) and ambiguities clarified  
148 with other authors (DL, FD).

149

150 To calculate response rates to PFDs, we used the 56-day legal requirement to classify  
151 responses as “early or on time” (on or before the due date), “late” (after due date), or  
152 “overdue” (response was not available on the Judiciary website as of the time of  
153 extraction). We calculated the average response rate and frequency for recipients. The  
154 content of responses were classified by the type of change reported if applicable.

155

### 156 **Missing data**

157 Coroners have a duty to write PFDs<sup>4,5</sup>, but this is not mandatory or enforced. Thus, data  
158 is constrained by the working practices of coroners who may vary in their thresholds for  
159 writing a PFD report. Furthermore, PFDs must be sent to the Chief Coroner’s Office who  
160 will assess the report before publication. In some instances, reports may go unpublished



## Preventable maternity deaths: a case series

161 as they have not been sent to the Chief Coroner's Office, get lost in the email inboxes or,  
162 in very rare cases the Chief Coroner will choose not publish the report at the request of  
163 family members or if the report poses a risk to the public<sup>18</sup>. We can therefore only analyse  
164 the publicly-available PFDs.

165

### 166 **Patient involvement**

167 No patients were directly involved in this study, however our research team constantly  
168 engages with bereaved families and friends who have lost a loved one through our  
169 platform the Preventable Deaths Tracker (<https://preventabledeathstracker.net/>). This  
170 engagement has guided the development of our platform and helped identify new  
171 research projects on specific areas of death prevention.

### 172 **Software and data sharing**

173 We used R (version 4.1.1) to create the openly available code to download and screen  
174 the pdf documents<sup>19</sup>. The OCCRP Aleph tool, an openly available platform was used for  
175 document storage and investigation management, as well as conducting the keyword  
176 searches<sup>8</sup>. Microsoft Excel was used for data extraction and analysis. Figures were  
177 created using Datawrapper<sup>20</sup>.

178

179

180

181

Preventable maternity deaths: a case series

## 182 RESULTS

183 There were 29 coroners' PFDs involving maternal deaths between July 2013 and August  
184 2023 in England and Wales (0.7% of all available PFDs, n=4435). When compared to  
185 data from MBRRACE-UK, PFDs represented only a small fraction of total maternal deaths  
186 (Table 1). Direct comparison was difficult due to MBRRACE data including all UK deaths,  
187 whereas PFDs only cover England and Wales.

188 **Table 1. Maternal deaths reported in coroners' PFDs published in England and**  
189 **Wales between July 2013 and August 2023 compared with deaths reported by**  
190 **MBRRACE in the UK between 2014 and 2021.**

| Average over 3 years* | Deaths reported by MBRRACE in the UK | Deaths reported in coroners' PFDs in England and Wales | Percentage of MBRRACE-UK deaths written into a PFD (%) |
|-----------------------|--------------------------------------|--------------------------------------------------------|--------------------------------------------------------|
| 2013-15               | 528                                  | 9                                                      | 1.7                                                    |
| 2014-16               | 511                                  | 9                                                      | 1.8                                                    |
| 2015-17               | 522                                  | 13                                                     | 2.5                                                    |
| 2016-18               | 522                                  | 8                                                      | 1.5                                                    |
| 2017-19               | 475                                  | 10                                                     | 2.1                                                    |
| 2018-20               | 518                                  | 5                                                      | 1.0                                                    |
| 2019-21               | 552                                  | 6                                                      | 1.1                                                    |
| 2020-22               | NA                                   | 6                                                      | NA                                                     |
| 2021-23               | NA                                   | 8                                                      | NA                                                     |

## Preventable maternity deaths: a case series

|                      |      |           |             |
|----------------------|------|-----------|-------------|
| <b>Total 2013-21</b> | 2774 | <b>29</b> | <b>1.1%</b> |
|----------------------|------|-----------|-------------|

191 \*A three year time period is used to align with MBRRACE reporting (Table 2.1 and 2.5, MBRRACE-  
192 UK Confidential Enquiries into Maternal Deaths 2013-21 reports)<sup>2</sup>

### 193 **Demographics**

194 The median age of death was 33.5 years (IQR 28.5-36.0 years, n=20). The median years  
195 of life lost was 54 years per death (n=20, total=1051 years). One death occurred in a  
196 person aged <17 years, and eight (27.5%) in those aged >35 years.

197 Deaths most often occurred in hospitals (75.9%) followed by other community settings  
198 outside of the home (10.3%), and one in the home (3.4%). The location of death was not  
199 reported in three cases (10.3%).

200 Deaths occurred in 23 coroners' areas out of a total of 82 areas in England in Wales,  
201 most frequently occurring in London Inner North (17.2%) (Supplementary Table S1).

202 The Chief Coroner's Office (CCO) categorise PFDs into one or more types of deaths of  
203 which the most (78%) common was 'Hospital death' (Supplementary Table S2).

204

### 205 **Causes of deaths**

206

207 **Figure 1. Causes of deaths reported by coroners in PFDs involving maternity**  
208 **deaths in England and Wales between July 2013 and August 2023.** Causes of death

## Preventable maternity deaths: a case series

209 from the 2019-2021 MBRRACE report were used to categorise deaths. Note: one case  
210 had >1 cause mentioned.

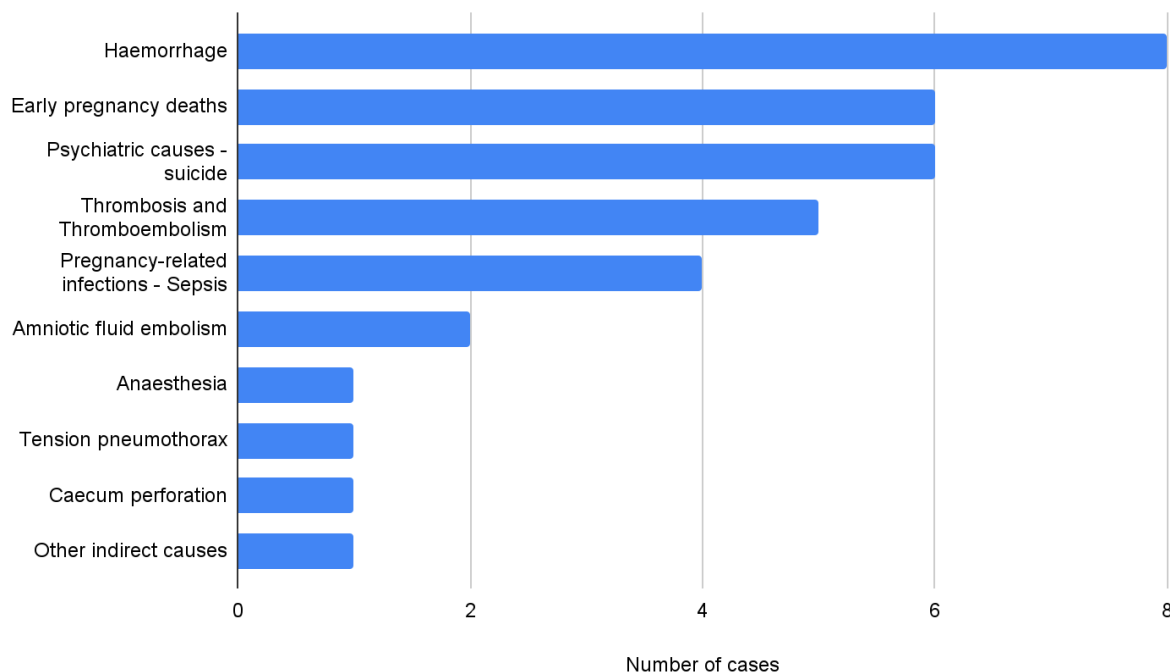

211  
212 The most frequent causes of death (Figure 1) reported by the coroner were haemorrhage  
213 (27.5%, n=8), followed by early pregnancy deaths (20.6%, n=6, which included  
214 complications of ectopic pregnancies and terminations), and suicide (20.6%; n=6).  
215 Further details of causes of death and ICD-11 coding can be found in Supplementary  
216 Table S2.

217 44.8% (n=13) cases reported none of the 15 factors associated with high risk  
218 pregnancies. 10.3% (n=3) of women had previous psychiatric history, and this was related  
219 to their cause of death. Other risk factors, including previous clotting disease and multiple  
220 pregnancies only occurred in a small number of individual (n=1) cases.

## Preventable maternity deaths: a case series

221 The majority (55.2%, n=16) of deaths occurred postpartum, including psychiatric causes  
222 and those occurring after abortion, or surgery for ectopic pregnancy. Antenatal deaths  
223 occurred in 24.1% (n=7) of women and intrapartum deaths (occurring during or within 24  
224 hours of labour) occurred in 20.6% (n=6) of cases.

225 In 9 PFDs (31.0%) it was explicitly stated that pregnancy went on to lead to a live birth.  
226 Four (13.8%) of deaths involved ectopic pregnancies, three (10.3%) involved terminations  
227 of pregnancy, and one (3.4%) involved a miscarriage (<24 weeks). Two (6.9%) cases  
228 involved antenatal deaths of the mother in which the child was presumed to have died. In  
229 10 cases, the outcome for the child was not mentioned.

### 230 **Coroner's concerns**

231 121 concerns were raised by coroners. The most common concern was regarding  
232 providing appropriate treatment (48.2%, n=14), the failure to escalate (37.9%, n=11),  
233 recognition of risk factors (31.0%, n=9), and lack of training (31.0%, n=9) (Supplementary  
234 Table S3). Specific lessons are discussed below in the next section.

### 235 **Responses to PFDs**

236 PFDs were sent to 53 organisations. These organisations included NHS trusts (n=19) and  
237 professional bodies such as the General Medical Council or Medical Royal Colleges  
238 (n=13). Only 37.7% of PFDs received a response from the organisation to which they  
239 were sent. When organisations did respond, 8.00% (16 out of 20) of reported new  
240 changes including publishing new local policies, increasing multidisciplinary training in  
241 obstetric scenarios, or committing to increasing staffing levels (Supplementary Table S4).

## Preventable maternity deaths: a case series

242 The relation of types of concerns to whether change was initiated can be found in Figure  
243 2. Specific actions taken in response to concerns can be found in Supplementary Table  
244 S1 and “Specific Lessons” above.

245

246 **Figure 2. Concerns raised by coroners (left) in Prevention of Future Deaths reports**  
247 **involving maternity deaths in England and Wales published between July 2013 and**  
248 **August 2023 and the actions reported by organisations in their responses (right).**

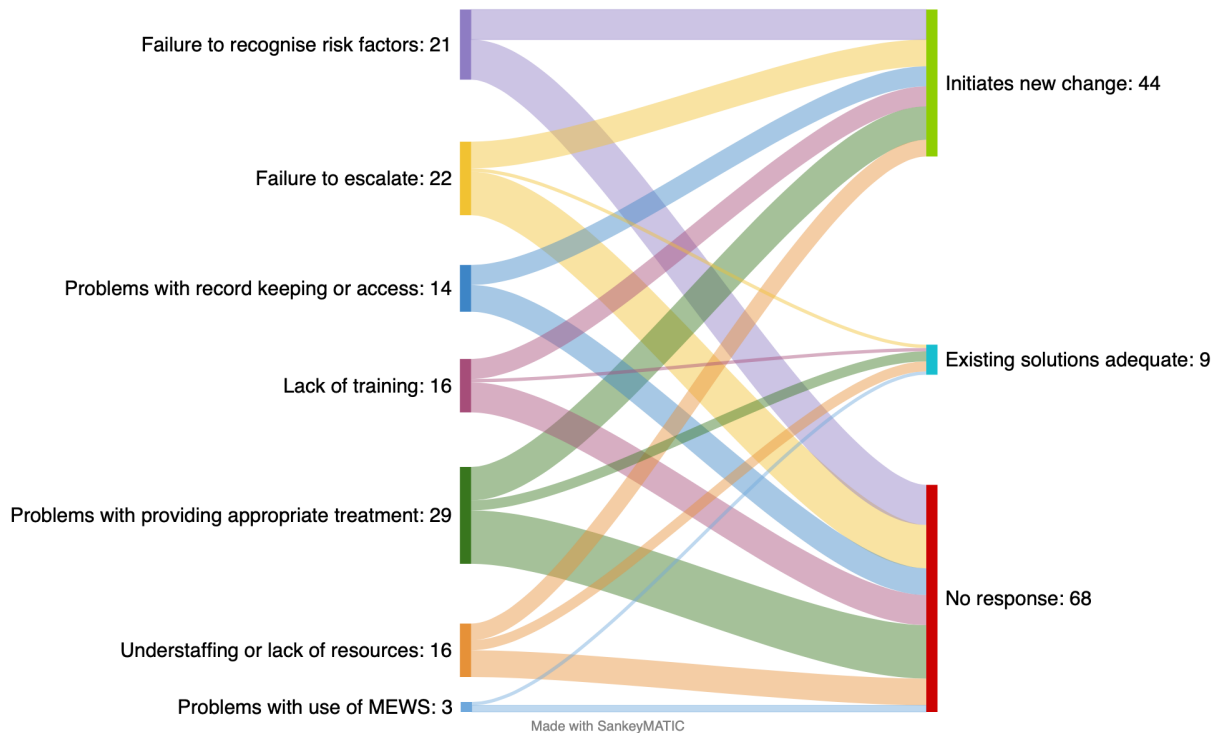

249

250

251

252

253 **SPECIFIC LESSONS**

Preventable maternity deaths: a case series

## 254 **Gaps in national guidance**

255 PFDs highlighted gaps in national maternal care guidance. One case (2017-0005)  
256 concerned poor follow-up for discoloration found on amniocentesis, for which there was  
257 no existing guideline. The patient later presented with chorioamnionitis and died. The  
258 coroner's suggestion to send such samples for immediate microbiological analysis was  
259 acknowledged by the Royal College of Obstetricians and Gynaecologists' (RCOG)  
260 response with updated guidelines<sup>21</sup>.

261  
262 Another patient (2021-0371) died due to sepsis from a retained fetus following feticide.  
263 The coroner highlighted the lack of guidance surrounding treatment of such infections, in  
264 particular whether antibiotics suffice, or if obstetric intervention is required. The hospital  
265 trust identified a similar death in the region and changed local guidelines. However, in lieu  
266 of national guidelines no specific treatment recommendations could be made.

267  
268 A 2016 PFD detailed the death of a patient from bowel obstruction following previous  
269 bariatric surgery (2016-0213), where surgical causes of her symptoms were not  
270 adequately considered during pregnancy nor was a specific obstetric plan made. It was  
271 noted that there are no national guidelines for obstetric planning for pregnant women with  
272 previous bariatric surgery, a patient subset that is increasing in number. No published  
273 response from the RCOG, General Medical Council or Care Quality Commission was  
274 available so there were no responses to the concerns raised in this PFD.

275

## 276 **National protocols not followed**

## Preventable maternity deaths: a case series

277 In a 2020 case (2020-0162), misoprostol administration to induce labour following  
278 intrauterine fetal death led to uterine rupture and maternal death. The hospital in question  
279 updated its misoprostol dose to match national guidelines and mandated medical reviews  
280 before misoprostol administration to multiparous mothers.

281  
282 Four cases highlighted deficiencies in major obstetric haemorrhage protocols. In two  
283 cases (2015-0288; 2023-0095), local guidelines did not reflect national recommendations  
284 and were updated accordingly. A specific problem was blood products not being available  
285 near the maternity unit. In the other two cases (2022-0228; 2017-0020), local guidelines  
286 were not followed, leading to delays in diagnosis and treatment.

287  
288 One death (2021-0418) resulted from a ruptured ectopic pregnancy where thrombolysis  
289 was administered for suspected pulmonary embolism (PE). While MBRRACE guidelines  
290 recommend a FAST scan in all women of child-bearing age suspected of a PE, this had  
291 not been integrated into local trust policy.

292  
293 Another PFD (2015-0414) detailed failure to prescribe adequate doses of clexane for a  
294 mechanical valve contributing to development of fatal thrombosis. The report expressed  
295 concern from doctors that this was a recurring issue. There was no published response  
296 from the hospital trust or National Institute for Health and Care Excellence (NICE), so it  
297 is unclear if action was taken.

298

299 **Communication issues**



## Preventable maternity deaths: a case series

300 In case (2015-0413), the patient attended the emergency department seven days  
301 postpartum, but obstetricians were not involved in her care, and information sharing  
302 between general practitioners, out of hours care and the obstetric department was poor.  
303 In another case (2019-0281), the ambulance crew did not communicate that the patient  
304 was pregnant to ED staff. In a third case (2019-0027), the obstetric department was not  
305 forewarned about a pregnant patient's arrival to ED, leading to delays in care. Two actions  
306 were reported by trusts in their responses, including the addition of a prompt to record  
307 pregnancy status on call sheets and the development of a set of criteria to determine if  
308 an obstetric call needs to be initiated prior to ambulance arrival.

309

310 Poor communication between teams was highlighted in the psychiatric care of pregnant  
311 women. Two PFDs reported failures to coordinate multidisciplinary care for pregnant  
312 patients between their medical and psychiatric teams (2015-0418, 2017-0055). Delays in  
313 accessing psychiatric care were found to directly contribute to the death of another patient  
314 (2022-0303).

315

### 316 **Lack of resources or staff-cover**

317 Concerns have also been raised regarding staffing and resource allocation. In one case,  
318 there was no formal method of getting assistance when the first consultant called could  
319 not attend an emergency (2019-0453). Another challenge appears to be regions with poor  
320 availability of perinatal health clinics. This was the case in one PFD (2014-0239), in which  
321 the mother was not able to access community care that met both her and her son's needs.

## Preventable maternity deaths: a case series

322 The report claimed that in the region mentioned, 50% referrals to the nearest Mother and  
323 Baby Perinatal Mental health in-patient Unit are declined due to distance.

324

325

326

327

Preventable maternity deaths: a case series

## 328 **DISCUSSION**

### 329 **Main Findings**

330 We identified 29 maternal deaths reported by coroners in PFDs. There was a broad range  
331 of causes of death, occurring mostly in the postpartum period in hospitals. Coroners  
332 raised significant concerns spanning all stages of pregnancy, but only 38% of PFDs  
333 received a response. PFDs frequently highlighted gaps in national guidance, lack of  
334 consistency in local guidelines, and problems with communication.

### 335 **Strengths and Limitations**

336 This study uses reproducible methods from previous research of PFDs involving other  
337 types of deaths<sup>12</sup>. However, to the best of our knowledge, it is the first published study of  
338 PFDs involving maternal deaths reported by coroners' in PFDs.

339 We compared the data from coroners with the MBRRACE-UK initiative – an established  
340 national data source on maternal deaths in the UK<sup>2</sup>. Our findings illustrate the ability of  
341 coroners' reports to provide unique case-level insights into issues in care, systems, and  
342 processes, which complements larger scale epidemiology research such as MBRRACE-  
343 UK.

344 Limitations of the PFD data are well-established<sup>22</sup>, including inter-corer and inter-  
345 regional variability in the publication of reports and the information reported in them. In  
346 the maternal setting, specifically, the type of deaths identified by coroners may be biased  
347 by those sent for autopsy. This has resulted in a small sample size of maternal deaths  
348 which may not be representative of maternal deaths as a whole in the UK.

## Preventable maternity deaths: a case series

349 PFDs also do not consistently report established factors contributing to maternal health  
350 inequality, including ethnicity, socio-economic status, and previous parity. It is difficult to  
351 conclude that risk factors were not present in a PFD case, as there is no requirement for  
352 coroners to consistently report them.

### 353 **Interpretation**

354 Maternal deaths continue to be major global health issue<sup>23</sup>. As emphasised in a recent  
355 call to action by the International Network of Obstetric Survey Systems (INOSS), one of  
356 the key steps to address stagnating maternal mortality rates is learning from case-based  
357 analyses of maternal deaths<sup>24</sup>. National analyses in the USA<sup>25</sup> and China<sup>26</sup> suggest that  
358 over 80% of maternal deaths may be preventable.

359  
360 Coroners in the UK are able to report maternal deaths to MBRRACE-UK<sup>2</sup>, which collates  
361 these deaths for the confidential enquiry into maternal death and morbidity. Separately,  
362 coroners have a duty to write PFDs, but we found that only around 1% of maternal deaths  
363 in the UK reported by MBRRACE were written into a PFD. This is an underestimate of  
364 the true number of maternal deaths where action ought to be taken by organisations.

365  
366 Coroner reports can provide unique insights into the systems and processes that can go  
367 wrong and lead to preventable deaths. An analysis of coroner reports of maternal deaths  
368 in Ontario, Canada<sup>27</sup> found that (when physical injury was excluded), the two most  
369 common causes of death were haemorrhage and suicide, both of which were in the top  
370 three causes of death seen in our study<sup>27</sup>.

371

## Preventable maternity deaths: a case series

372 Many of the concerns raised in PFDs were reflected in the most recent MBRRACE-UK<sup>2</sup>  
373 report, including failures in providing appropriate treatment, recognising risk factors, and  
374 communication issues, which is an important aspect of maternal care highlighted in the  
375 wider literature<sup>28</sup>. Similar concerns found in our analysis and MBRRACE-UK included a  
376 need to have accessible electronic records, better shared management care across  
377 multidisciplinary teams, and identification of care coordinators when multiple teams are  
378 involved. A thematic analysis of maternal deaths in London, the region with the highest  
379 number of maternity-related PFDs, conducted by the London Maternity Network's  
380 Maternal Morbidity and Mortality Working Group, had similar messages including  
381 improved adherence to protocols and improved access to care for women with complex  
382 medical needs<sup>29</sup>.

## 383 **CONCLUSION**

384 PFDs are an under-recognised source of data for improving maternal care and reducing  
385 preventable deaths. Organisations that receive PFDs from coroners may be failing to take  
386 action as there is no mechanism to follow up on missing responses or ensure that  
387 reported actions are implemented. Using PFDs, we identified issues in the provision of  
388 care and gaps in national guidance and policy. We have created a reproducible method  
389 for collecting and analysing reports (<https://preventabledeathstracker.net/>), so that PFDs  
390 can be more widely used as a learning tool to prevent future deaths. To improve access  
391 to such reports, the Chief Coroner's Office should consider updating their categorisation  
392 of deaths and include 'Maternal deaths' as an official classification for PFDs.

393

Preventable maternity deaths: a case series

## 394 **Acknowledgements**

395 None.

## 396 **Disclosure of interests**

397 JJ and DL declare no interests. FD works as a doctor in the National Health Service  
398 (NHS). GCR has a fixed-term contract of employment at the University of Oxford to teach  
399 evidence-based medicine and supervise research. GCR is the Director of a limited  
400 company that has provided consultancy for the private sector. GCR travel expenses have  
401 been reimbursed for speaking at conferences and events, and she has received a  
402 speaker's fee for providing training and speaking at coronial law events. GCR receives  
403 fees from subscriptions to a personal Substack publication.

404

## 405 **Contribution to authorship**

406 GCR established the methodology used to perform case series' of PFDs  
407 (<https://preventabledeathstracker.net/>). JJ and DL conceived of the study and wrote the  
408 protocol. FD wrote the code used to download the pdf documents and performed the  
409 keyword screening using the OCCRP Aleph tool. JJ and DL performed data extraction  
410 and analysis. All authors interpreted the study findings and contributed to writing and  
411 reviewing the manuscript. All authors accept responsibility for the paper as published.

412

## 413 **Details of Ethics Approval**

414 This study uses publicly available information, for which ethics committee approval is not  
415 required. Both the General Data Protection Regulation (GDPR) and the Data Protection

## Preventable maternity deaths: a case series

416 Act (2018) no longer apply to identifiable data that relate to a person once they have  
417 died(30).

418

### 419 **Funding**

420 No funding has been obtained to undertake this study.

421

### 422 **Data availability**

423 Protocols and study materials used for data synthesis are openly available on the Open  
424 Science Framework (<https://osf.io/7h4j6/>). Demographic information from all PFD cases  
425 is openly available on the Preventable Deaths Tracker  
426 (<https://preventabledeathstracker.net>). The code used to download all the PFD pdf  
427 documents is openly available ([https://github.com/francescodernie/coroner\\_PFDs](https://github.com/francescodernie/coroner_PFDs)).

428

429

430

431

432

433

434

## Preventable maternity deaths: a case series

### 435 **References**

- 436 1. Trends in maternal mortality 2000 to 2020: estimates by WHO, UNICEF, UNFPA, World  
437 Bank Group and UNDESA/Population Division [Internet]. [cited 2024 Mar 25]. Available  
438 from: <https://www.who.int/publications/i/item/9789240068759>
- 439 2. Knight M, Bunch K, Felker A, Patel R, Kotnis R, Kenyon S, Kurinczuk JJ (Eds. ) on behalf  
440 of MBRRACE-UK. Saving Lives, Improving Mothers' Care Core Report - Lessons learned  
441 to inform maternity care from the UK and Ireland Confidential Enquiries into Maternal  
442 Deaths and Morbidity 2019-21. Oxford National Perinatal Epidemiology Unit, University of  
443 Oxford; 2023.
- 444 3. Foreign, Commonwealth & Development Office. Policy Paper: Ending preventable deaths  
445 of mothers, babies and children by 2030 [Internet]. 2021. Available from:  
446 [https://www.gov.uk/government/publications/ending-preventable-deaths-of-mothers-babies-](https://www.gov.uk/government/publications/ending-preventable-deaths-of-mothers-babies-and-children-by-2030)  
447 [and-children-by-2030](https://www.gov.uk/government/publications/ending-preventable-deaths-of-mothers-babies-and-children-by-2030)
- 448 4. The Coroners Rules 1984. Rule 43.  
449 1984.<http://www.legislation.gov.uk/uksi/1984/552/article/43/made> (accessed 16 Jun 2019).
- 450 5. Coroners and Justice Act 2009.  
451 2009.[https://www.legislation.gov.uk/ukpga/2009/25/pdfs/ukpga\\_20090025\\_en.pdf](https://www.legislation.gov.uk/ukpga/2009/25/pdfs/ukpga_20090025_en.pdf)  
452 (accessed 16 May 2019).
- 453 6. The NHS Patient Safety Strategy: Safer culture, safer systems, safer patients (July 2019)  
454 [https://www.england.nhs.uk/wp-](https://www.england.nhs.uk/wp-content/uploads/2020/08/190708_patient_safety_strategy_for_website_v4.pdf)  
455 [content/uploads/2020/08/190708\\_patient\\_safety\\_strategy\\_for\\_website\\_v4.pdf](https://www.england.nhs.uk/wp-content/uploads/2020/08/190708_patient_safety_strategy_for_website_v4.pdf).
- 456 7. Jindal J, Launer D, Richards GC, Dernie F. Preventable deaths involving Pregnancy and  
457 Maternity [Internet]. OSF. [cited 2024 5]. Available from: <https://osf.io/7h4j6/>
- 458 8. OCCRP Aleph. <https://aleph.occrp.org>.
- 459 9. World Health Organisation Global Health Observatory: Maternal Deaths [Internet]. [cited  
460 2023 Nov 5]. Available from: [https://www.who.int/data/gho/indicator-metadata-registry/imr-](https://www.who.int/data/gho/indicator-metadata-registry/imr-details/4622)  
461 [details/4622](https://www.who.int/data/gho/indicator-metadata-registry/imr-details/4622).
- 462 10. Dernie F, France HS, Thomas ET, Bilip M, DeVito NJ, Ferner RE, et al. Preventable deaths  
463 involving opioids in England and Wales, 2013–2022: a systematic case series of coroners'  
464 reports. *Journal of Public Health*. 2023;45(4):e656–63.
- 465 11. France HS, Aronson JK, Heneghan C, Ferner RE, Cox AR, Richards GC. Preventable  
466 Deaths Involving Medicines: A Systematic Case Series of Coroners' Reports 2013–22.  
467 *Drug Safety*. 2023 Apr 1;46(4):335–42.
- 468 12. Bremner BT, Heneghan C, Aronson JK, Richards GC. A systematic narrative review of  
469 coroners' Prevention of Future Deaths reports (PFDs): A tool for patient safety in hospitals.  
470 *Journal of Patient Safety and Risk Management*. 2023;28(5):227–36.
- 471 13. Nair M, Knight M, Kurinczuk JJ. Risk factors and newborn outcomes associated with  
472 maternal deaths in the UK from 2009 to 2013: a national case-control study. *Bjog*.  
473 2016;123(10):1654–62.



## Preventable maternity deaths: a case series

- 474 14. Martinez R, Soliz P, Caixeta R, Ordunez P. Reflection on modern methods: years of life lost  
475 due to premature mortality—a versatile and comprehensive measure for monitoring non-  
476 communicable disease mortality. *International Journal of Epidemiology*. 2019;48(4):1367–  
477 76.
- 478 15. Office for National Statistics (ONS). Past and projected period and cohort life tables: 2020-  
479 based, UK, 1981 to 2070.  
480 <https://www.ons.gov.uk/peoplepopulationandcommunity/birthsdeathsandmarriages/lifeexpectancies/bulletins/pastandprojecteddatabyperiodandcohortlifetables/2020baseduk1981to2070>.  
481  
482
- 483 16. International Classification of Diseases, Eleventh Revision (ICD-11), World Health  
484 Organization (WHO) 2019/2021 <https://icd.who.int/browse11>. Licensed under Creative  
485 Commons Attribution-NoDerivatives 3.0 IGO licence (CC BY-ND 3.0 IGO).
- 486 17. Kleinheksel AJ, Rockich-Winston N, Tawfik H, Wyatt TR. Demystifying Content Analysis.  
487 *Am J Pharm Educ*. 2020;84(1):7113.
- 488 18. Chief Coroner. Prevention of Future Deaths Reports Publication Policy.  
489 <https://www.judiciary.uk/wp-content/uploads/2021/11/pfd-publication-policy-9-11-21.pdf>.
- 490 19. Dernie F. Coroner PFD github. [https://github.com/francescodernie/coroner\\_pfds](https://github.com/francescodernie/coroner_pfds).
- 491 20. Data Wrapper. <https://www.datawrapper.de>.
- 492 21. Navaratnam K, Alfirevic Z, Royal College of Obstetricians and Gynaecologists.  
493 Amniocentesis and chorionic villus sampling: Green-top Guideline No. 8 July 2021: Green-  
494 top Guideline No. 8. *BJOG*. 2022 Jan;129(1):e1–15.
- 495 22. Zhang Q, Richards GC. Lessons from web scraping coroners' Prevention of Future Deaths  
496 reports. *Medico-Legal Journal*. 2023;0(0):00258172221141284.
- 497 23. Khalil A, Samara A, O'Brien P, Coutinho CM, Quintana SM, Ladhani SN. A call to action:  
498 the global failure to effectively tackle maternal mortality rates. *The Lancet Global Health*.  
499 2023;11(8):e1165–7.
- 500 24. van den Akker T, D'Souza R, Tura AK, Nair M, Engjom H, Knight M, et al. Prioritising  
501 actions to address stagnating maternal mortality rates globally. *The Lancet*. 2024 Feb  
502 3;403(10425):417–9.
- 503 25. Trost SL, Beauregard J, Njie F, et al. Pregnancy-Related Deaths: Data from Maternal  
504 Mortality Review Committees in 36 US States, 2017-2019. Atlanta, GA: Centers for  
505 Disease Control and Prevention, US Department of Health and Human Services; 2022.
- 506 26. Liang J, Dai L, Zhu J, Li X, Zeng W, Wang H, et al. Preventable maternal mortality:  
507 Geographic/rural-urban differences and associated factors from the population-based  
508 maternal mortality surveillance system in China. *BMC Public Health*. 2011 Apr  
509 19;11(1):243.
- 510 27. Aflaki K, Vigod SN, Sprague AE, Cook J, Berger H, Aoyama K, et al. Maternal Deaths  
511 Using Coroner's Data: A Latent Class Analysis. *Journal of Obstetrics and Gynaecology*  
512 Canada [Internet]. Available from: <https://doi.org/10.1016/j.jogc.2024.102349>

## Preventable maternity deaths: a case series

- 513 28. Brennan RA, Keohane CA. How Communication Among Members of the Health Care  
514 Team Affects Maternal Morbidity and Mortality. *Journal of Obstetric, Gynecologic &*  
515 *Neonatal Nursing*. 2016;45(6):878–84.
- 516 29. London Maternity Clinical Network, Maternal Morbidity and Mortality Working Group.  
517 London Maternal Mortality Thematic Review for 2017. NHS England and NHS Improvement  
518 [Internet]. 2019. Available from: [https://www.england.nhs.uk/london/wp-](https://www.england.nhs.uk/london/wp-content/uploads/sites/8/2019/11/London-maternal-mortality-thematic-review-2017_18th-July-2019-.pdf)  
519 [content/uploads/sites/8/2019/11/London-maternal-mortality-thematic-review-2017\\_18th-](https://www.england.nhs.uk/london/wp-content/uploads/sites/8/2019/11/London-maternal-mortality-thematic-review-2017_18th-July-2019-.pdf)  
520 [July-2019-.pdf](https://www.england.nhs.uk/london/wp-content/uploads/sites/8/2019/11/London-maternal-mortality-thematic-review-2017_18th-July-2019-.pdf)
- 521 30. Health Research Authority (HRA): Consent and Participant Information Guidance [Internet].  
522 [cited 2024 Mar 28]. Available from: [https://www.hra-](https://www.hra-decisiontools.org.uk/consent/principles-deceased.html#:~:text=In%20legal%20terms%2C%20the%20General,person%20once%20they%20have%20died.)  
523 [decisiontools.org.uk/consent/principles-](https://www.hra-decisiontools.org.uk/consent/principles-deceased.html#:~:text=In%20legal%20terms%2C%20the%20General,person%20once%20they%20have%20died.)  
524 [deceased.html#:~:text=In%20legal%20terms%2C%20the%20General,person%20once%20](https://www.hra-decisiontools.org.uk/consent/principles-deceased.html#:~:text=In%20legal%20terms%2C%20the%20General,person%20once%20they%20have%20died.)  
525 [they%20have%20died.](https://www.hra-decisiontools.org.uk/consent/principles-deceased.html#:~:text=In%20legal%20terms%2C%20the%20General,person%20once%20they%20have%20died.)
- 526
- 527
